1 1. Title Page

2 **Title:**

3 CD4<sup>+</sup> T cell mitochondrial genotype in Multiple Sclerosis: a cross-sectional and longitudinal analysis

4

5 **Authors:**

6 Filipe Cortes-Figueiredo <sup>1,2,3</sup>, Susanna Asseyer <sup>2,3</sup>, Claudia Chien <sup>2,3</sup>, Hanna G. Zimmermann <sup>2,4</sup>,

7 Klemens Ruprecht <sup>5</sup>, Tanja Schmitz-Hübsch <sup>2,3</sup>, Judith Bellmann-Strobl <sup>2,3</sup>, Friedemann Paul <sup>2,3,\*</sup>,

8 Vanessa A. Morais <sup>1\*</sup>

9

10 **Affiliations:**

11 <sup>1</sup> VMorais Lab – Mitochondria Biology & Neurodegeneration, Instituto de Medicina Molecular João

12 Lobo Antunes, Faculdade de Medicina, Universidade de Lisboa, Lisbon, Portugal

13 <sup>2</sup> Experimental and Clinical Research Center, a cooperation between the Max Delbrück Center for

14 Molecular Medicine in the Helmholtz Association & Charité – Universitätsmedizin Berlin, Berlin,

15 Germany.

16 <sup>3</sup> NeuroCure Clinical Research Center, Charité – Universitätsmedizin Berlin, corporate member of

17 Freie Universität Berlin, Humboldt-Universität zu Berlin, and Berlin Institute of Health, Berlin,

18 Germany

19 <sup>4</sup> Einstein Center Digital Future, Berlin, Germany

20 <sup>5</sup> Department of Neurology, Charité – Universitätsmedizin Berlin, corporate member of Freie

21 Universität Berlin, Humboldt-Universität zu Berlin, and Berlin Institute of Health, Berlin, Germany

22

23 **Co-corresponding authors (\*):**

24 Vanessa A. Morais; vmorais@medicina.ulisboa.pt

25 Friedemann Paul; friedemann.paul@charite.de

26

## 27 2. Abstract

28 Multiple Sclerosis (MS) is a chronic autoimmune demyelinating disease of the central nervous  
29 system (CNS), with a largely unknown etiology, where mitochondrial dysfunction significantly  
30 contributes to neuroaxonal loss and brain atrophy. Mirroring the CNS, peripheral immune cells from  
31 patients with MS, particularly CD4<sup>+</sup> T cells, show inappropriate mitochondrial phenotypes and/or  
32 oxidative phosphorylation (OxPhos) insufficiency, with a still unknown contribution of mitochondrial  
33 DNA (mtDNA). We hypothesized that mitochondrial genotype in CD4<sup>+</sup> T cells might influence MS  
34 disease activity and progression.

35 Thus, we performed a retrospective cross-sectional and longitudinal study on patients with a recent  
36 diagnosis of either Clinically Isolated Syndrome (CIS) or Relapsing-Remitting MS (RRMS) at two  
37 timepoints: six months (VIS1) and 36 months (VIS2) after disease onset. Our primary outcomes were  
38 the differences in mtDNA extracted from CD4<sup>+</sup> T cells between: (I) patients with CIS/RRMS (PwMS)  
39 at VIS1 and age- and sex-matched healthy controls (HC), in the cross-sectional analysis, and (II)  
40 different diagnostic evolutions in PwMS from VIS1 to VIS2, in the longitudinal analysis.

41 We successfully performed mtDNA whole genome sequencing (WGS) (mean coverage: 2055.77  
42 reads/base pair) in 183 samples (61 triplets). Nonetheless, mitochondrial genotype was not  
43 associated with a diagnostic of CIS/RRMS, nor with longitudinal diagnostic evolution.

44

## 45 3. Keywords

46 multiple sclerosis; case-control study; cohort study; mitochondrial DNA; CD4<sup>+</sup> T cell

47

## 48 4. Introduction

49 Multiple Sclerosis (MS) is a chronic neuroinflammatory and neurodegenerative disease with a  
50 largely unknown etiology, secondary to an autoimmune demyelination in the central nervous  
51 system (CNS). Histopathologically, it is characterized by gliosis, oligodendrocyte death, and  
52 neuroaxonal loss [1]. Worldwide, approximately 2.8 million patients with MS deal with significant  
53 levels of disability [2].

54 Several studies have shown that the autoimmune response seen in MS mostly derives from a  
55 dysfunctional autoreactive CD4<sup>+</sup> T cell compartment [3–5], although other pro-inflammatory cells,  
56 such as B cells and myeloid cells, seem to be implicated as well [6]. Recently, mitochondria have also  
57 been shown to play a role in driving MS disease activity and progression. In the CNS, mitochondrial  
58 dysfunction has been found to be a critical trigger for neuroaxonal loss and brain atrophy [7,8]. In  
59 the peripheral immune compartment, CD4<sup>+</sup> T cells from patients with MS show oxidative  
60 phosphorylation (OxPhos) insufficiency [9–11], which, in animal models, has been linked to an  
61 exacerbation of CNS autoimmune-mediated inflammation [12,13].

62 In parallel, mutations in mitochondrial DNA (mtDNA), which is responsible for encoding 22 transfer  
63 RNAs (tRNAs), two ribosomal RNAs (rRNAs), and 13 proteins of the OxPhos chain, as well as  
64 particular haplogroups, which are inherited mutational patterns that may be classified into  
65 phylogenetic clusters [14,15], have also been associated with an increased risk of MS, albeit not  
66 consistently [16–20].

67 Interestingly, mtDNA polymorphisms have been shown to modulate both metabolism and immunity  
68 [21,22], and mtDNA variants have significant tissue-specificity, including in T cells [23]. Nonetheless,  
69 whether the aforementioned CD4<sup>+</sup> T cell OxPhos dysfunction in patients with MS is an inherent  
70 consequence of the particular mitochondrial genotype of this immune subset remains unknown.

71 We hypothesized that mitochondrial genotype in CD4<sup>+</sup> T cells might influence MS disease activity  
72 and progression. Thus, we aimed to explore the differences in mtDNA extracted from CD4<sup>+</sup> T cells  
73 between patients with a recent diagnosis of either Clinically Isolated Syndrome (CIS) or Relapsing-  
74 Remitting MS (RRMS) and healthy controls (HC). We also analyzed longitudinal mtDNA changes in  
75 patients with CIS/RRMS (PwMS).

76

## 77 5. Materials and Methods

### 78 5.1. Cohort description

79 We performed an observational retrospective evaluation of prospectively collected data within the  
80 Berlin CIS-Cohort (reference: NCT01371071) [24] at the Charité — Universitätsmedizin Berlin, Berlin,  
81 Germany. Berlin CIS-Cohort's inclusion criteria are: (I) age ≥ 18 years and (II) diagnosis of either  
82 Clinically Isolated Syndrome (CIS) within six months from symptom onset or of Relapsing-Remitting

83 Multiple Sclerosis (RRMS) within two years from symptom onset, according to the 2017 revisions of  
84 the McDonald criteria [25].

85 To address the disease activity and progression of patients with CIS/RRMS (PwMS), the following  
86 variables were assessed on each clinical visit: number of relapses and time to last relapse; expanded  
87 disability status scale (EDSS) and Multiple Sclerosis functional composite (MSFC) scores; brain MRI:  
88 T2 hyperintense lesions and T1 gadolinium-enhancing lesions; and optical coherence tomography  
89 (OCT): peripapillary retinal nerve fiber layer (RNFL) thickness and ganglion cell-inner plexiform layer  
90 (GCIPL) volume. Additionally, we assessed if patients fulfilled the criteria for no evidence of disease  
91 activity (NEDA)-3, namely, absence of new relapses, on MRI: no T1 gadolinium-enhancing lesions  
92 and no new or enlarging T2 hyperintense lesions and the absence of EDSS worsening. Details of MRI,  
93 OCT, and NEDA-3 were described earlier [26]. Finally, blood samples were collected and,  
94 subsequently, peripheral blood mononuclear cells (PBMCs) were isolated. Further details on the  
95 methodology used for collection and analysis of clinical data may be found in Section 1 of the  
96 Supplementary Information.

97 PwMS were included in this study if biological samples and a clinical assessment were available for  
98 two clinical visits: six months (VIS1) and 36 months (VIS2) after disease onset. Recruitment of HC  
99 without a family history of MS was finalized in May 2019; HC were matched to PwMS in a 1:1 ratio  
100 according to sex and a maximum age difference of five years.

101 Our primary outcomes were a mitochondrial genotype comparison between: (I) PwMS and HC in  
102 the cross-sectional analysis and (II) different diagnostic evolutions from VIS1 to VIS2 in the  
103 longitudinal analysis, namely, CIS in both clinical visits, a conversion from CIS to RRMS, and RRMS in  
104 both clinical visits.

105 Since mtDNA whole genome sequencing (WGS) in CD4<sup>+</sup> T cells from PwMS was unreported in the  
106 literature, a pilot study with 20 triplets (20 PwMS at VIS1&VIS2 and 20 age- and sex-matched HC)  
107 was performed to determine the appropriateness of the sample size through the Dupont method  
108 [27].

109

### 110 5.1.1. Ethical approval

111 The institutional review board (IRB)'s approval was obtained by the Ethics Committee of the Charité  
112 — Universitätsmedizin Berlin (application number: EA1/182/10), informed consents were given by  
113 every subject, and the study followed the standards of the Declaration of Helsinki [28].

114

## 115 5.2. Sample processing

### 116 5.2.1. CD4<sup>+</sup> T cell enrichment and flow cytometry analysis

117 PBMC sample processing was performed at the same time for each triplet (PwMS at VIS1&VIS2 and  
118 HC), to minimize differences within processing. The MojoSort™ Human CD4 T Cell Isolation Kit  
119 (#480010, BioLegend, San Diego, CA, USA) was used for CD4<sup>+</sup> T cell enrichment, in accordance with  
120 the manufacturer's instructions.

121 To assess whether CD4<sup>+</sup> T cell enrichment was achieved, flow cytometry was performed in a BD  
122 LSRFortessa™ X-20 Cell Analyzer (BD Biosciences, Franklin Lakes, NJ, USA) on a subset of samples  
123 (before and after magnetic enrichment). The following antibodies were used: CD14-eFluor450  
124 (#48014941, clone 61D3, eBioscience™, Thermo Fisher Scientific, Waltham, MA, USA); CD19-Alexa  
125 Fluor 647 (#302222, clone H1B19, BioLegend, San Diego, CA, USA); CD3-PerCP-Cy5.5 (#45003741,  
126 clone OKT3, eBioscience™, Thermo Fisher Scientific, Waltham, MA, USA); CD4-BV711 (#317439,  
127 clone OKT4, BioLegend, San Diego, CA, USA); and CD56-PE-Cy7 (#25056741, clone CMSSB/NCAM,  
128 eBioscience™, Thermo Fisher Scientific, Waltham, MA, USA).

129 Regarding the gating strategy, CD4<sup>+</sup> T cells were defined as CD3<sup>+</sup>CD4<sup>+</sup>CD19<sup>-</sup>CD56<sup>-</sup> single cells (Figure  
130 S5 and Figure S6). A detailed protocol and additional details regarding the methodology used for  
131 CD4<sup>+</sup> T cell enrichment and flow cytometry may be found in Section 2 of the Supplementary  
132 Information.

133

### 134 5.2.2. DNA extraction and mtDNA sequencing, including bioinformatic processing and data analysis

135 Similarly, DNA extraction was performed at the same time for each triplet with the QIAamp® DNA  
136 Blood Midi Kit (QIAGEN GmbH, Hilden, Germany), according to the manufacturer's instructions.

137 Samples were sequenced with the Applied Biosystems™ Precision ID mtDNA Whole Genome Panel  
138 (Thermo Fisher Scientific, Waltham, MA, USA) at IPATIMUP — Instituto de Patologia e Imunologia  
139 Molecular da Universidade do Porto (Porto, Portugal). Libraries were prepared using the Ion Chef™

140 automated protocol and samples were run on 530™ chips with the Ion Torrent™ Ion S5™ (Thermo  
141 Fisher Scientific, Waltham, MA, USA). Samples with a coverage uniformity < 85% and/or a mean  
142 coverage < 1500 reads were resequenced.

143 Regarding bioinformatic processing, the PrecisionCallerPipeline (PCP) pipeline [29] was used, with  
144 mutserve v2 [30,31] for variant calling, HaploGrep v2.4.0 [15] for haplogroup calling, and  
145 Haplocheck v1.3.3 [31] for a contamination check. To account for possible false positives, variants  
146 with a variant level (VL) ≥ 10% were only accepted if they were found with both the PCP pipeline  
147 and the Ion Torrent Suite™ Software (TSS), while variants below TSS's limit of detection (10%) and  
148 solely present with PCP were filtered in accordance with: (I) sequencing indicators for variant  
149 reliability (normalized coverage, coverage ratio, mean value of reported nuclear insertions of  
150 mitochondrial DNA [NUMTs], and the distance to the amplicon's edge); and (II) previous reports of  
151 the same variants in curated mtDNA databases. Variants only present in TSS were excluded [29].

152 Data analysis was performed with R version 4.1.1 [32] and Excel 2016 (Microsoft Corporation,  
153 Redmond, WA, USA).

154 The level of statistical significance was set at a two-sided *p*-value < 0.05 for all tests and multiple  
155 comparison testing was adjusted with false discovery rate (FDR). Whenever data was missing, it was  
156 censored from the analysis. Reporting followed the standards from STROBE [33] and its extension  
157 STREGA [34].

158 A detailed description of the methodology regarding DNA extraction, bioinformatic processing, and  
159 data analysis may be found in Section 3 of the Supplementary Information.

160

## 161 6. Results

### 162 6.1. Cohort description

163 Overall, 61 PwMS were included in this study cohort (Table 1). Most patients presented with RRMS  
164 at both clinical visits, mean follow-up time between VIS1 and VIS2 was 30.50 ± 1.27 (mean ± SD)  
165 months. Approximately one third of the PwMS (N=20) suffered a relapse between VIS1 and VIS2,  
166 while PwMS under MS immunomodulatory treatment increased from 26.23% to 47.54%. The  
167 average age difference between PwMS at VIS1 and HC was 2.06 ± 1.31 (mean ± SD) years.

168 As mentioned previously, a pilot study with 20 triplets (20 PwMS at VIS1&VIS2 and 20 age- and sex-  
169 matched HC) was performed to determine the appropriateness of the sample size through the  
170 Dupont method [27]. Following WGS data analysis of this subset, a 35% discordance in prevalence  
171 was detected for deleterious variants in Complex I — 55% for PwMS at VIS1 (discordant prevalence:  
172 45%) vs. 20% for HC (discordant prevalence: 10%). Hence, the sample size was adequate according  
173 to this endpoint.

174

## 175 6.2. CD4<sup>+</sup> T cell enrichment, DNA extraction, and WGS quality

176 Following the magnetic enrichment in CD4<sup>+</sup> T cells, we obtained a wide range in the number of cells  
177 and cell mortality, for all subject types (Table 2 and Table S5). In comparison with HC, PwMS at VIS1  
178 showed a lower number of cells (mean difference of 0.65 million, 95% confidence interval [CI] 0.16–  
179 1.14; paired t-test adjusted with FDR). In comparison with VIS2, cells from PwMS at VIS1 had lower  
180 mortality (mean difference of 2.77%, 95% CI 0.56–4.97%; paired t-test adjusted with FDR).

181 Nonetheless, a significant increase in CD4<sup>+</sup> T cells (CD3<sup>+</sup> CD4<sup>+</sup> CD56<sup>-</sup> CD19<sup>-</sup>) was achieved (Figure 1A,  
182 and Table S3: mean fold change in paired samples of 2.59, 95% CI 2.31–2.87; paired t-test,  $N=49$ ),  
183 regardless of subject type (Table S4).

184 Subsequently, after the extraction of DNA, variable amounts of DNA were achieved (Table 2 and  
185 Table S5). In comparison with PwMS at VIS1, HC had higher yields of extracted DNA (mean difference  
186 of 4.45 ng/ $\mu$ L for the measurement with Synergy HTX, 95% CI 1.06–7.84, and mean difference of  
187 3.35 ng/ $\mu$ L for the measurement with Qubit<sup>®</sup>, 95% CI 0.80–5.90; paired t-tests adjusted with FDR).

188 However, while, as expected, the two DNA measurements showed a correlation between each other  
189 (Figure S9A: adjusted  $R^2$  of 0.88 and a  $p$ -value  $< 2.2 \times 10^{-16}$ , linear regression model) and the number  
190 of cells used for DNA extraction correlated with DNA concentration (Figure S9B: adjusted  $R^2$  of 0.77  
191 and a  $p$ -value  $< 2.2 \times 10^{-16}$ , linear regression model), DNA concentration had no effect on mtDNA  
192 coverage (Figure S9C–D), with most variability appearing to arise from each sequencing run (Figure  
193 S9E–F). Correspondingly, no differences in mtDNA coverage and mappability were found between  
194 different subject types (Figure 1B–D and Figure S9E–F).

195 Taking into account all samples analyzed through WGS (Table S7), no contamination was detected  
196 and all haplogroups corresponded to European lineages. PwMS had the same haplogroup with two

197 minor exceptions (Triplets #5 and #48) at both visits, albeit without changing their simplified  
198 haplogroup (Table S7).

199

### 200 6.3. Cross-sectional comparison

201 The total number of variants was similar between different subject types, i.e., between HC and  
202 PwMS at VIS1 and between VIS1 and VIS2 for PwMS (Figure 2 and Table S7: paired t-tests adjusted  
203 with FDR). Variant distribution was also bimodal in all subject types (Figure 2A), likely arising from  
204 each sample's haplogroup (Figure 2B–C), since the mean number of variants in HC and PwMS at  
205 VIS1 was significantly different in haplogroups with at least three samples ( $p$ -value  $3.34 \times 10^{-16}$ ;  
206 Kruskal-Wallis test). Haplogroups H and HV had significantly fewer variants (Table S8), which is  
207 consistent with the revised Cambridge Reference Sequence (rCRS)'s own H haplogroup [35].  
208 Nonetheless, haplogroup distribution was independent from subject type (HC and PwMS at VIS1;  
209 Fisher's exact test with Monte Carlo simulations).

210 When comparing HC and PwMS at VIS1, we observed that the total number of variants did not vary  
211 according to age (Figure S10A: linear regression model). The difference in the number of mutations  
212 between HC and PwMS at VIS1 was also not influenced by sex (Figure S10B–C: two sample t-test  
213 [Figure S10B],  $\chi^2$  test of independence [Figure S10C], and two-proportions z-test [Figure S10C]).

214 When looking at the differences between PwMS at VIS1 and HC in various mtDNA regions, the  
215 highest discordancy in prevalence was in *MT-ND3* for PwMS at VIS1 and in *MT-RNR2* for HC (Figure  
216 S11A), while the highest discordant adjusted mutational rate, which is the sum of all VLs in a specific  
217 region divided by its region size, was in *MT-TA* for PwMS at VIS1 and in *MT-TT* for HC (Figure S11B).  
218 However, there were no significant differences for discordant prevalence (Figure S11A: McNemar's  
219 tests adjusted with FDR); nor for other discordant mutational rates (Figure S11B: paired t-tests  
220 adjusted with FDR).

221 Regarding macro regions in mtDNA, the most commonly discordant affected region for PwMS at  
222 VIS1 was *Other*, which refers to positions in rCRS with an overlap between the two strands or left  
223 unannotated, and, for HC, transfer RNA (tRNA) (Figure S11C), while the region with the highest  
224 discordant adjusted mutational rate was Complex III for PwMS at VIS1 and *Other* for HC (Figure  
225 S11D). Nonetheless, there were no significant differences for discordant prevalence (Figure S11C:



226 McNemar's tests adjusted with FDR); nor for discordant mutational rates (Figure S11D: paired t-  
227 tests adjusted with FDR).

228 We further took all variants into account (Table S9), to see if individual variants differed between  
229 HC and PwMS at VIS1. However, no significant differences were found (Table S9: McNemar's tests  
230 adjusted with FDR). Interestingly, a single PwMS had a pathogenic variant, namely, m.11778G>A in  
231 the *MT-ND4* gene (Table S9), which is associated with Leber's hereditary optic neuropathy (LHON)  
232 and neuropathy, ataxia, and retinitis pigmentosa (NARP), albeit at low VLs: 5.8% and 7.3% for VIS1  
233 and VIS2, respectively; well below the VLs usually required for pathogenesis [36]. The patient in  
234 question initially presented with pyramidal and sensory complaints, maintaining the latter  
235 throughout their disease course, without any visual changes.

236 Subsequently, we took into account variants predicted *in silico* to be likely deleterious for proteins,  
237 defined by a mean value > 0.5 from two independent scores: (I) MutPred [37,38]; and (II) APOGEE  
238 [39] (Figure S12 and Figure 3). Nevertheless, the number of deleterious variants (Figure S12A) and  
239 the cumulative deleterious burden (Figure 3A), which corresponds to the total sum of a variant's VL  
240 multiplied by its deleterious score per sample, did not differ significantly between the different  
241 subject types (paired t-tests adjusted with FDR).

242 We observed a similar haplogroup-specific effect for both the number of deleterious mutations and  
243 cumulative deleterious burden (Figure S12B–C and Figure 3B–C:  $p$ -values  $4.61 \times 10^{-13}$  and  $1.38 \times 10^{-15}$ ,  
244 respectively; Kruskal-Wallis tests). Haplogroups J and T had significantly more deleterious  
245 variants (Table S10) and cumulative deleterious burden (Table S11).

246 When comparing HC and PwMS at VIS1, the number of deleterious variants did not vary according  
247 to age (Figure S13A: Kendall rank correlation test). The difference in the number of deleterious  
248 mutations between HC and PwMS at VIS1 was also not influenced by sex (Figure S13B–C: two sample  
249 t-test [Figure S13B],  $\chi^2$  test of independence [Figure S13C], and two-proportions z-test [Figure  
250 S13C]). The same was true for cumulative deleterious burden (linear regression model for age  
251 [Figure S13D] and two sample t-test for sex [Figure S13E]).

252 Regarding differences between PwMS at VIS1 and HC in various mtDNA regions, the highest  
253 discordancy in prevalence was in *MT-ND5* for PwMS at VIS1 and in *MT-ATP6* for HC (Figure 4A). In  
254 parallel, the highest discordant adjusted cumulative deleterious rate, which is the cumulative  
255 deleterious rate for a specific region relative to its region size, was in *MT-ND3* for PwMS at VIS1 and

256 in *MT-ATP6* for HC (Figure 4B). Regardless, no significant differences were found for discordant  
257 prevalence (Figure 4A: McNemar's tests adjusted with FDR); nor for discordant cumulative  
258 deleterious rates (Figure 4B: paired t-tests adjusted with FDR).

259 Regarding macro regions in mtDNA, the most commonly discordant affected region was Complex I  
260 for PwMS at VIS1 and Complex V for HC (Figure 4C), while the region with the highest adjusted  
261 cumulative deleterious rate was Complex III for PwMS at VIS1 and Complex V for HC (Figure 4D).  
262 However, there were no significant differences for discordant prevalence (Figure 4C: McNemar's  
263 tests adjusted with FDR); nor for cumulative deleterious rate (Figure 4D: paired t-tests adjusted with  
264 FDR).

265 Finally, we looked into tRNA mutations predicted to be pathogenic according to the MitoTIP score  
266 [40]: no variants were found (Figure S14A). The cumulative MitoTIP score, which corresponds to the  
267 total sum of a variant's VL multiplied by its MitoTIP score per sample, was similar in all subject types  
268 (Figure S14B–C: paired t-tests adjusted with FDR).

269 Nonetheless, as observed previously, haplogroup had a significant influence in the cumulative  
270 MitoTIP score (Figure S14B–C:  $p$ -value  $3.59 \times 10^{-13}$ ; Kruskal-Wallis test), with haplogroups K and U  
271 having higher cumulative MitoTIP scores, whereas haplogroups H and HV had lower scores (Table  
272 S12). No influence was found regarding age (Figure S14D: linear regression model); or sex (Figure  
273 S14E: two sample t-test). The region with the highest discordant adjusted cumulative MitoTIP rate,  
274 which is the cumulative MitoTIP rate for a specific region relative to its region size, was *MT-TA* for  
275 PwMS at VIS1 and *MT-TT* for HC (Figure S14F). However, no significant differences were found  
276 (paired t-tests adjusted with FDR).

277

#### 278 6.4. Longitudinal comparison

279 As mentioned previously, there were no significant differences between PwMS at VIS1 and at VIS2  
280 (paired t-tests adjusted with FDR) concerning total number of variants (Figure 2A), number of  
281 deleterious variants (Figure S12A), cumulative deleterious burden (Figure 3A), and cumulative  
282 MitoTIP score (Figure S14B).

283 The mean proportion of mutations present in a single visit — novel variants — were 4.01% (range:  
284 0.00–53.33%) for VIS1 and 3.38% (range: 0.00–37.14%) for VIS2 (Figure 5A), with mean VLs of 8.39%

285 (range: 2.50–100.00%) for VIS1 and 4.66% (range: 2.50–19.60%) for VIS2 (Figure 5B); no significant  
286 differences were found between different visits (paired t-tests).

287 Subsequently, we considered the difference in VLs for the previously found variants between the  
288 second and the first visits — old variants. The mean VL change was 0.06% in all variants (Figure 5C)  
289 and 0.09% per subject (Figure 5D) (range: -10.90–50.30%). Both VL changes were statistically similar  
290 to zero (one-sample t-test).

291 When we compared novel and old variants, novel variants had a significantly lower VL than old  
292 variants (Figure S15A: adjusted  $p$ -value  $1.80 \times 10^{-150}$ ; two-sample t-test adjusted with FDR) and a  
293 lower coverage ratio (Figure S15C: adjusted  $p$ -value  $1.09 \times 10^{-6}$ ; two-sample t-test adjusted with  
294 FDR). There were no significant differences for other quality control variables [29] (Figure S15B and  
295 Figure S15D–E; two-sample t-tests adjusted with FDR), nor for protein deleterious score and MitoTIP  
296 score (Figure S15F–G; two-sample t-tests adjusted with FDR).

297 Since each PwMS had a very similar mutational pattern between the two visits, we then moved on  
298 from an intrapersonal comparison to an interpersonal comparison, with a focus on exploring the  
299 origin of these novel variants and the VL change in old variants in the full PwMS cohort. For that  
300 purpose, we considered a PwMS as a single data point, where we performed the mean of the results  
301 from both sequencing runs.

302 Afterwards, we considered the various possible causes or cofactors behind differences in the  
303 proportion of novel variants, VLs of novel variants or VL change in old variants. Haplogroup (Figures  
304 S16–18A; Kruskal-Wallis test), age (Figures S16–18B; linear regression model), and sex (Figures S16–  
305 18C; two sample t-test) did not influence the aforementioned WGS variables. Interestingly, different  
306 regions had a significant effect on the proportion of novel variants, excluding patients without novel  
307 variants and regions with mutations from less than three paired samples (Figure S16D:  $p$ -value  $5.90$   
308  $\times 10^{-6}$ ; Kruskal-Wallis test), where *MT-TI* had the highest prevalence and D-loop the lowest (Table  
309 S13). This effect was absent for VLs of novel variants or VL change in old variants (Figures S17–18D;  
310 Kruskal-Wallis test).

311 Regarding the clinical variables in the cohort, change in MS medication status, i.e., Yes vs. No (Table  
312 1 and Table S14), was independent from diagnostic evolution (Figure S19: Fisher's exact test with  
313 Monte Carlo simulations).

314 To identify associations of clinical disability with diagnostic evolution, we performed batch Kruskal-  
315 Wallis tests with diagnostic evolution as a grouping variable for each available clinical variable  
316 (Figure S20 and Figure S21). Two different approaches were tested: (I) the mean of each clinical  
317 variable between VIS1 and VIS2 (Figure S20); and (II) the change of each clinical variable from VIS1  
318 to VIS2, by subtracting VIS2 and VIS1 (Figure S21). After multiple comparison correction with FDR,  
319 only the mean values of the number and volume of T2 hyperintense lesions were associated with  
320 diagnostic change (Table S15).

321 Similarly, we performed batch Kruskal-Wallis tests with diagnostic evolution as a grouping variable  
322 for each WGS variable explained previously (Figure S22); no significant differences were found  
323 (Table S16). Additionally, haplogroup was independent from diagnostic evolution (Figure S23:  
324 Fisher's exact test with Monte Carlo simulations). Similarly, as a post hoc analysis, dividing patients  
325 according to NEDA-3 status (Table 1 and Figure S24) or cumulative deleterious burden (Figures S25–  
326 26) yielded null results.

327

## 328 7. Discussion

329 The present study investigated whether mitochondrial genotype in CD4<sup>+</sup> T cells influenced MS  
330 disease activity and progression. Accordingly, we performed WGS from CD4<sup>+</sup> T cells in a matched  
331 cohort of PwMS. Overall, however, there were no significant differences regarding number of  
332 variants, number of deleterious variants, cumulative protein deleterious burden, or cumulative  
333 MitoTIP score between PwMS and HC, nor after a mean of 30.50 months of follow-up between VIS1  
334 and VIS2 for PwMS.

335 Importantly, the CIS/RRMS cohort herein described is representative of the overall population of  
336 PwMS in Germany, regarding mean age at onset, female predominance, and distribution of the  
337 diagnoses, with a vast majority of RRMS [41].

338 According to the flow cytometry analysis performed in a subset of magnetically enriched samples,  
339 CD4<sup>+</sup> T cell enrichment was successful with the MojoSort™ Human CD4 T Cell Isolation Kit, which  
340 was expected [42]. The Precision ID mtDNA Whole Genome Panel, in combination with the PCP  
341 pipeline [29], proved particularly valuable, as it was able to obtain mtDNA WGS from all samples

342 without signs of contamination, despite a wide range of the number of cells after processing the  
343 samples, and, consequently, of DNA yield, which is consistent with previous reports [43].  
344 Curiously, amongst the 21 most prevalent mutations in PwMS, five had already been associated with  
345 MS, ranging from case reports to large epidemiological studies [16,18,44–46]. Furthermore,  
346 remarkably, the high number of deleterious variants in complex I and IV matches the pattern of  
347 decreased activity in these complexes in CD4<sup>+</sup> T cells of PwMS in previous studies [9,47]. Moreover,  
348 the higher number of deleterious variants and cumulative deleterious burden from haplogroups J  
349 and T is consistent with previous reports of increased MS risk for these haplogroups [16,17].  
350 Nevertheless, in our cohort, the mitochondrial genotype did not differ significantly between PwMS  
351 and HC, nor between VIS1 and VIS2 within PwMS, which is consistent with previous mtDNA WGS  
352 studies in PwMS [19,20].  
353 In contrast to the 35% discordance in prevalence for deleterious variants in Complex I registered in  
354 the pilot study, the final difference was 18%, due to an increase in prevalence of 8% for HC, while in  
355 PwMS it decreased by 9%. Thus, our sample size was incompatible with the previously-set endpoint.  
356 A further limitation might have also been the mtDNA WGS of the very heterogenous CD4<sup>+</sup> T cell  
357 compartment, as well as its magnetic enrichment, as opposed to other methods aimed at achieving  
358 higher cell purity. Nonetheless, previous studies focused on CD4<sup>+</sup> T cell OxPhos dysfunction in  
359 patients with MS employing magnetic enrichment and fewer subjects than the present cohort were  
360 still successful in defining a clear mitochondrial phenotype [9,47].  
361 Despite these limitations, this study constitutes a thorough cross-sectional and longitudinal analysis  
362 of mtDNA WGS in PwMS, in addition to surveying mitochondrial genotype specifically in CD4<sup>+</sup> T cells.  
363 Moreover, we were able to assess the longitudinal dynamics of mtDNA, which have only very  
364 recently started to be unveiled [48,49].  
365 Overall, CD4<sup>+</sup> T cell mitochondrial genotype was not associated with a diagnostic of CIS/RRMS, nor  
366 with longitudinal diagnostic evolution. We further postulate that mitochondrial dysfunction in CD4<sup>+</sup>  
367 T cells is unlikely to derive from mitochondrial genotype.

368

## 369 8. References

- 370 1. Dendrou CA, Fugger L, Friese MA. Immunopathology of multiple sclerosis. *Nat Rev Immunol*.  
371 2015;15:545–58.
- 372 2. Multiple Sclerosis International Federation. Atlas of MS – 3rd Edition. Part 1: Mapping multiple  
373 sclerosis around the world. Key epidemiology findings [Internet]. 2020 [cited 2022 Aug 26]. Available  
374 from: <https://www.atlasofms.org/>
- 375 3. Gerdes LA, Janoschka C, Eveslage M, Mannig B, Wirth T, Schulte-Mecklenbeck A, et al. Immune  
376 signatures of prodromal multiple sclerosis in monozygotic twins. *Proc Natl Acad Sci*.  
377 2020;117:21546–56.
- 378 4. Cruciani C, Puthenparampil M, Tomas-Ojer P, Jelcic I, Docampo MJ, Planas R, et al. T-Cell  
379 Specificity Influences Disease Heterogeneity in Multiple Sclerosis. *Neurol - Neuroimmunol*  
380 *Neuroinflammation*. 2021;8:e1075.
- 381 5. Böttcher C, Fernández-Zapata C, Schlickeiser S, Kunkel D, Schulz AR, Mei HE, et al. Multi-  
382 parameter immune profiling of peripheral blood mononuclear cells by multiplexed single-cell mass  
383 cytometry in patients with early multiple sclerosis. *Sci Rep*. 2019;9:19471.
- 384 6. Bar-Or A, Li R. Cellular immunology of relapsing multiple sclerosis: interactions, checks, and  
385 balances. *Lancet Neurol*. Elsevier; 2021;20:470–83.
- 386 7. Campbell GR, Ziabreva I, Reeve AK, Krishnan KJ, Reynolds R, Howell O, et al. Mitochondrial DNA  
387 deletions and neurodegeneration in multiple sclerosis. *Ann Neurol*. John Wiley & Sons, Ltd;  
388 2011;69:481–92.
- 389 8. Witte ME, Nijland PG, Drexhage JAR, Gerritsen W, Geerts D, van het Hof B, et al. Reduced  
390 expression of PGC-1 $\alpha$  partly underlies mitochondrial changes and correlates with neuronal loss in  
391 multiple sclerosis cortex. *Acta Neuropathol (Berl)*. 2013;125:231–43.
- 392 9. De Riccardis L, Rizzello A, Ferramosca A, Urso E, De Robertis F, Danieli A, et al. Bioenergetics profile  
393 of CD4<sup>+</sup> T cells in relapsing remitting multiple sclerosis subjects. *J Biotechnol*. 2015;202:31–9.

- 394 10. La Rocca C, Carbone F, De Rosa V, Colamatteo A, Galgani M, Perna F, et al. Immunometabolic  
395 profiling of T cells from patients with relapsing-remitting multiple sclerosis reveals an impairment  
396 in glycolysis and mitochondrial respiration. *Metabolism*. 2017;77:39–46.
- 397 11. De Biasi S, Simone AM, Bianchini E, Lo Tartaro D, Pecorini S, Nasi M, et al. Mitochondrial  
398 functionality and metabolism in T cells from progressive multiple sclerosis patients. *Eur J Immunol*.  
399 2019;49:2204–21.
- 400 12. Zhang D, Jin W, Wu R, Li J, Park S-A, Tu E, et al. High Glucose Intake Exacerbates Autoimmunity  
401 through Reactive-Oxygen-Species-Mediated TGF- $\beta$  Cytokine Activation. *Immunity*. 2019;51:671-  
402 681.e5.
- 403 13. Luu M, Pautz S, Kohl V, Singh R, Romero R, Lucas S, et al. The short-chain fatty acid pentanoate  
404 suppresses autoimmunity by modulating the metabolic-epigenetic crosstalk in lymphocytes. *Nat*  
405 *Commun*. 2019;10:760.
- 406 14. Taylor RW, Turnbull DM. Mitochondrial DNA mutations in human disease. *Nat Rev Genet*.  
407 2005;6:389–402.
- 408 15. Weissensteiner H, Pacher D, Kloss-Brandstätter A, Forer L, Specht G, Bandelt H-J, et al.  
409 HaploGrep 2: mitochondrial haplogroup classification in the era of high-throughput sequencing.  
410 *Nucleic Acids Res*. 2016;44:W58-63.
- 411 16. Yu X, Koczan D, Sulonen A-M, Akkad DA, Kroner A, Comabella M, et al. mtDNA nt13708A Variant  
412 Increases the Risk of Multiple Sclerosis. *PLOS ONE*. Public Library of Science; 2008;3:e1530.
- 413 17. Tranah GJ, Santaniello A, Caillier SJ, D’Alfonso S, Martinelli Boneschi F, Hauser SL, et al.  
414 Mitochondrial DNA sequence variation in multiple sclerosis. *Neurology*. 2015;85:325–30.
- 415 18. Yonova-Doing E, Calabrese C, Gomez-Duran A, Schon K, Wei W, Karthikeyan S, et al. An atlas of  
416 mitochondrial DNA genotype-phenotype associations in the UK Biobank. *Nat Genet*. 2021;53:982–  
417 93.

- 418 19. Souren NYP, Gerdes LA, Kümpfel T, Lutsik P, Klopstock T, Hohlfeld R, et al. Mitochondrial DNA  
419 Variation and Heteroplasmy in Monozygotic Twins Clinically Discordant for Multiple Sclerosis. Hum  
420 Mutat. 2016;37:765–75.
- 421 20. Pienaar IS, Mohammed R, Courtley R, Gledson MR, Reynolds R, Nicholas R, et al. Investigation  
422 of the correlation between mildly deleterious mtDNA Variations and the clinical progression of  
423 multiple sclerosis. Mult Scler Relat Disord. 2021;53:103055.
- 424 21. Uittenbogaard M, Brantner CA, Fang Z, Wong L-J, Gropman A, Chiaramello A. The m.11778 A >  
425 G variant associated with the coexistence of Leber’s hereditary optic neuropathy and multiple  
426 sclerosis-like illness dysregulates the metabolic interplay between mitochondrial oxidative  
427 phosphorylation and glycolysis. Mitochondrion. 2019;46:187–94.
- 428 22. Beadnell TC, Fain C, Vivian CJ, King JCG, Hastings R, Markiewicz MA, et al. Mitochondrial genetics  
429 cooperate with nuclear genetics to selectively alter immune cell development/trafficking. Biochim  
430 Biophys Acta BBA - Mol Basis Dis. 2020;1866:165648.
- 431 23. Walker MA, Lareau CA, Ludwig LS, Karaa A, Sankaran VG, Regev A, et al. Purifying Selection  
432 against Pathogenic Mitochondrial DNA in Human T Cells. N Engl J Med. 2020;383:1556–63.
- 433 24. Charite University, Berlin, Germany. Clinically Isolated Syndrome and Newly Diagnosed Multiple  
434 Sclerosis: Diagnostic, Prognostic and Therapy - Response Markers - a Prospective Observational  
435 Study (Berlin CIS-COHORT) [Internet]. clinicaltrials.gov; 2011 Jun. Report No.: NCT01371071.  
436 Available from: <https://clinicaltrials.gov/ct2/show/NCT01371071>
- 437 25. Thompson AJ, Banwell BL, Barkhof F, Carroll WM, Coetzee T, Comi G, et al. Diagnosis of multiple  
438 sclerosis: 2017 revisions of the McDonald criteria. Lancet Neurol. 2018;17:162–73.
- 439 26. Lin T-Y, Vitkova V, Asseger S, Martorell Serra I, Motamedi S, Chien C, et al. Increased Serum  
440 Neurofilament Light and Thin Ganglion Cell-Inner Plexiform Layer Are Additive Risk Factors for  
441 Disease Activity in Early Multiple Sclerosis. Neurol Neuroimmunol Neuroinflammation.  
442 2021;8:e1051.



- 443 27. Dupont WD. Power calculations for matched case-control studies. *Biometrics*. 1988;44:1157–  
444 68.
- 445 28. World Medical Association. World Medical Association Declaration of Helsinki: ethical principles  
446 for medical research involving human subjects. *JAMA*. 2013;310:2191–4.
- 447 29. Cortes-Figueiredo F, Carvalho FS, Fonseca AC, Paul F, Ferro JM, Schönherr S, et al. From Forensics  
448 to Clinical Research: Expanding the Variant Calling Pipeline for the Precision ID mtDNA Whole  
449 Genome Panel. *Int J Mol Sci*. 2021;22:12031.
- 450 30. Weissensteiner H, Forer L, Fuchsberger C, Schöpf B, Kloss-Brandstätter A, Specht G, et al.  
451 mtDNA-Server: next-generation sequencing data analysis of human mitochondrial DNA in the cloud.  
452 *Nucleic Acids Res*. 2016;44:W64-69.
- 453 31. Weissensteiner H, Forer L, Fendt L, Kheirkhah A, Salas A, Kronenberg F, et al. Contamination  
454 detection in sequencing studies using the mitochondrial phylogeny. *Genome Res*. 2021;
- 455 32. R Core Team. R: A Language and Environment for Statistical Computing [Internet]. Vienna,  
456 Austria: R Foundation for Statistical Computing; 2021 [cited 2022 Feb 2]. Available from:  
457 <https://www.R-project.org/>
- 458 33. von Elm E, Altman DG, Egger M, Pocock SJ, Gøtzsche PC, Vandenbroucke JP, et al. The  
459 Strengthening the Reporting of Observational Studies in Epidemiology (STROBE) statement:  
460 guidelines for reporting observational studies. *Epidemiol Camb Mass*. 2007;18:800–4.
- 461 34. Little J, Higgins JPT, Ioannidis JPA, Moher D, Gagnon F, von Elm E, et al. STrengthening the  
462 REporting of Genetic Association Studies (STREGA): an extension of the STROBE statement. *PLoS*  
463 *Med*. 2009;6:e22.
- 464 35. Bandelt H-J, Kloss-Brandstätter A, Richards MB, Yao Y-G, Logan I. The case for the continuing use  
465 of the revised Cambridge Reference Sequence (rCRS) and the standardization of notation in human  
466 mitochondrial DNA studies. *J Hum Genet*. 2014;59:66–77.

- 467 36. Chung C-Y, Valdebenito GE, Chacko AR, Duchon MR. Rewiring cell signalling pathways in  
468 pathogenic mtDNA mutations. *Trends Cell Biol.* 2021;S0962892421002075.
- 469 37. Li B, Krishnan VG, Mort ME, Xin F, Kamati KK, Cooper DN, et al. Automated inference of molecular  
470 mechanisms of disease from amino acid substitutions. *Bioinforma Oxf Engl.* 2009;25:2744–50.
- 471 38. Pereira L, Soares P, Radivojac P, Li B, Samuels DC. Comparing phylogeny and the predicted  
472 pathogenicity of protein variations reveals equal purifying selection across the global human mtDNA  
473 diversity. *Am J Hum Genet.* 2011;88:433–9.
- 474 39. Castellana S, Fusilli C, Mazzoccoli G, Biagini T, Capocefalo D, Carella M, et al. High-confidence  
475 assessment of functional impact of human mitochondrial non-synonymous genome variations by  
476 APOGEE. *PLoS Comput Biol.* 2017;13:e1005628.
- 477 40. Sonney S, Leipzig J, Lott MT, Zhang S, Procaccio V, Wallace DC, et al. Predicting the pathogenicity  
478 of novel variants in mitochondrial tRNA with MitoTIP. *PLOS Comput Biol. Public Library of Science;*  
479 *2017;13:e1005867.*
- 480 41. Ohle L-M, Ellenberger D, Flachenecker P, Friede T, Haas J, Hellwig K, et al. Chances and challenges  
481 of a long-term data repository in multiple sclerosis: 20th birthday of the German MS registry. *Sci*  
482 *Rep.* 2021;11:13340.
- 483 42. Godinho-Santos A, Foxall RB, Antão AV, Tavares B, Ferreira T, Serra-Caetano A, et al. Follicular  
484 Helper T Cells Are Major Human Immunodeficiency Virus-2 Reservoirs and Support Productive  
485 Infection. *J Infect Dis.* 2020;221:122–6.
- 486 43. Faccinnetto C, Sabbatini D, Serventi P, Rigato M, Salvoro C, Casamassima G, et al. Internal  
487 validation and improvement of mitochondrial genome sequencing using the Precision ID mtDNA  
488 Whole Genome Panel. *Int J Legal Med.* 2021;135:2295–306.
- 489 44. Kalman B, Lublin FD, Alder H. Characterization of the mitochondrial DNA in patients with multiple  
490 sclerosis. *J Neurol Sci.* 1996;140:75–84.

491 45. Vyshkina T, Sylvester A, Sadiq S, Bonilla E, Canter JA, Perl A, et al. Association of common  
492 mitochondrial DNA variants with multiple sclerosis and systemic lupus erythematosus. Clin Immunol  
493 Orlando Fla. 2008;129:31–5.

494 46. Andalib S, Emamhadi M, Yousefzadeh-Chabok S, Salari A, Sigaroudi AE, Vafaei MS. MtDNA  
495 T4216C variation in multiple sclerosis: a systematic review and meta-analysis. Acta Neurol Belg.  
496 2016;116:439–43.

497 47. De Riccardis L, Ferramosca A, Danieli A, Trianni G, Zara V, De Robertis F, et al. Metabolic response  
498 to glatiramer acetate therapy in multiple sclerosis patients. BBA Clin. 2016;6:131–7.

499 48. Penter L, Gohil SH, Lareau C, Ludwig LS, Parry EM, Huang T, et al. Longitudinal Single-Cell  
500 Dynamics of Chromatin Accessibility and Mitochondrial Mutations in Chronic Lymphocytic Leukemia  
501 Mirror Disease History. Cancer Discov. 2021;

502 49. Wang Y, Guo X, Ye K, Orth M, Gu Z. Accelerated expansion of pathogenic mitochondrial DNA  
503 heteroplasmies in Huntington’s disease. Proc Natl Acad Sci. 2021;118:e2014610118.

504

## 505 9. Acknowledgements

506 We would like to thank Ana Mafalda Rocha, Bettina Vogelreuter, Bibiane Seeger-Schwinge, Filipa S.  
507 Carvalho, Jana Hermann, René Gieß, and Rosalie Schmidt for their support in the conduction of this  
508 study. Additionally, we would like to thank Susan Pikol and Cynthia Kraut for their MRI lesion  
509 segmentations and collection of MRI data related to this study. We would also like to thank the Flow  
510 Cytometry Facility of the Instituto de Medicina Molecular João Lobo Antunes for their technical  
511 support, particularly Diana Macedo. Finally, we would like to express our most sincere gratitude to  
512 all the subjects who have participated in this research project.

513

## 514 10. Author contributions

515 F.C.F. was responsible for: Conceptualization of the research study, execution of the experimental  
516 tasks, data analysis, and manuscript draft preparation. S.A. was responsible for: Clinical data

517 curation and collection, subject recruitment, critical review of the study's conceptualization, and  
518 manuscript revision. C.C. was responsible for: MRI data collection and management, MRI data  
519 analysis, and manuscript revision. H.G.Z. was responsible for: OCT data analysis and management,  
520 and manuscript revision. K.R. was responsible for: Clinical data collection, subject recruitment, and  
521 manuscript revision. T.S.-H. was responsible for: Cohort management, clinical data collection,  
522 subject recruitment, project administration, and manuscript revision. J.B.-S. was responsible for:  
523 Cohort management, clinical data collection, subject recruitment, project administration, critical  
524 review of the study's conceptualization, and manuscript revision. F.P. and V.A.M. were responsible  
525 for: Conceptualization of the research study, funding acquisition, provision of resources, supervision  
526 of data interpretation, and manuscript revision (co-senior authors). All authors read and approved  
527 the final manuscript.

528

## 529 11. Data availability statement

530 Participant consent did not include sharing of individual study data. Data may be made available for  
531 the purpose of replication of results upon reasonable request from the corresponding authors.

532

## 533 12. Additional information

### 534 12.1. Funding

535 This research was funded by Merck Germany (restricted research grant), the National Multiple  
536 Sclerosis Society (NMSS), NMSS Pilot Research Grant (PP-1712-29466), and Fundação para a Ciência  
537 e Tecnologia (FCT) (FCT/PTDC/MED-NEU/7976/2020). F.C.F.'s stipend was supported by FCT  
538 (PD/BD/114122/2015) and by Merck Germany (restricted research grant). V.A.M. is an iFCT  
539 researcher (IF/01693/2014; IMM/CT/27-2020). The NeuroCure Clinical Research Center (NCRC) is  
540 funded by the Deutsche Forschungsgemeinschaft (DFG, German Research Foundation) under  
541 Germany's Excellence Strategy—EXC-2049—390688087 (granted to F.P.).

542 We would also like to acknowledge the Fundos Europeus Estruturais e de Investimento (FEEI) from  
543 Programa Operacional Regional de Lisboa 2020 and FCT, grants LISBOA-01-0145-FEDER-016394,

544 LISBOA-01-0145-FEDER-016417, and POCI-01-0145-FEDER-022184, as well as PPBI-POCI-01-0145-  
545 FEDER-022122.

546 Funding sources had no influence on the collection, analysis, and interpretation of data, nor in  
547 writing the manuscript.

548

## 549 [12.2. Competing interests](#)

550 F.C.F. reports no disclosures relevant to the manuscript. S.A. received speaker's honoraria from  
551 Alexion, Bayer and Roche. C.C. received speaking honoraria from Bayer and research funding from  
552 Novartis, unrelated to the current study. H.G.Z. received speaking honoraria from Bayer and  
553 Novartis and research funding from Novartis, unrelated to the current study. K.R. received research  
554 support from Novartis Pharma, Merck Serono, German Ministry of Education and Research,  
555 European Union (821283-2), Stiftung Charité, Guthy Jackson Charitable Foundation and Arthur  
556 Arnstein Foundation; received travel grants from Guthy Jackson Charitable Foundation. K.R. is a  
557 participant in the BIH Clinical Fellow Program funded by Stiftung Charité. T.S.-H. reports no  
558 disclosures relevant to the manuscript. J.B.-S. received speaking honoraria and travel grants from  
559 Bayer Healthcare, and sanofi-aventis/Genzyme, in addition received compensation for serving on a  
560 scientific advisory board of Roche, unrelated to the presented work. F.P. serves as an Associate  
561 Editor for Neurology: Neuroimmunology & Neuroinflammation and PLoS ONE, reports speaker  
562 honoraria and/or travel grants from Bayer, Novartis, Biogen Idec, Teva, Sanofi-Aventis / Genzyme,  
563 Merck Serono, Alexion, Chugai, MedImmune, Shire, Roche, Actelion, and Celgene, research support  
564 from Bayer, Novartis, Biogen Idec, Teva, Sanofi-Aventis / Genzyme, Alexion, Merck Serono, German  
565 Research Council (DFG Exc 257), Werth Stiftung of the City of Cologne, German Ministry of Education  
566 and Research (BMBF Competence Network Multiple Sclerosis), Arthur Arnstein Stiftung Berlin, EU  
567 FP7 Framework Program (combims.eu), Arthur Arnstein Foundation Berlin, Guthy Jackson  
568 Charitable Foundation, and National Multiple Sclerosis Society of the USA, consultancies for Sanofi-  
569 Aventis / Genzyme, Biogen Idec, MedImmune, Shire, and Alexion, and is a member of the steering  
570 committee of the OCTIMS study (Novartis). V.A.M. reports no disclosures relevant to the  
571 manuscript.

572

### 573 12.3. List of abbreviations

574 **bp(s)** — base pair(s)

575 **CI** — confidence interval

576 **CIS** — Clinically Isolated Syndrome

577 **EDSS** — expanded disability status scale

578 **FDR** — false discovery rate

579 **GCIPL** — ganglion cell-inner plexiform layer

580 **gd** — gadolinium

581 **HC** — healthy control(s)

582 **IRB** — institutional review board

583 **les** — lesions

584 **LHON** — Leber's hereditary optic neuropathy

585 **MS** — Multiple Sclerosis

586 **MSFC** — Multiple Sclerosis functional composite

587 **mtDNA** — mitochondrial DNA

588 **N** — number

589 **NARP** — neuropathy, ataxia, and retinitis pigmentosa

590 **NEDA** — no evidence of disease activity

591 **NUMT(s)** — nuclear insertion(s) of mitochondrial DNA

592 **OCT** — optical coherence tomography

593 **OxPhos** — oxidative phosphorylation

594 **PBMC** — peripheral blood mononuclear cell

595 **PCP** — PrecisionCallerPipeline

596 **PwMS** — patient(s) with Clinically Isolated Syndrome/Relapsing-Remitting Multiple Sclerosis

597 **rCRS** — revised Cambridge Reference Sequence

598 **RRMS** — Relapsing-Remitting Multiple Sclerosis

599 **rRNA** — ribosomal RNA

600 **tRNA** — transfer RNA

601 **TSS** — Ion Torrent Suite™ Software

602 **V** — volume

603 **V1** — patient(s) with Clinically Isolated Syndrome/Relapsing-Remitting Multiple Sclerosis at visit 1,  
604 six months after disease onset  
605 **V2** — patient(s) with Clinically Isolated Syndrome/Relapsing-Remitting Multiple Sclerosis at visit 2,  
606 36 months after disease onset  
607 **VIS1** — visit 1  
608 **VIS2** — visit 2  
609 **VL(s)** — variant level(s)  
610 **WGS** — whole genome sequencing  
611

## 612 13. Figures

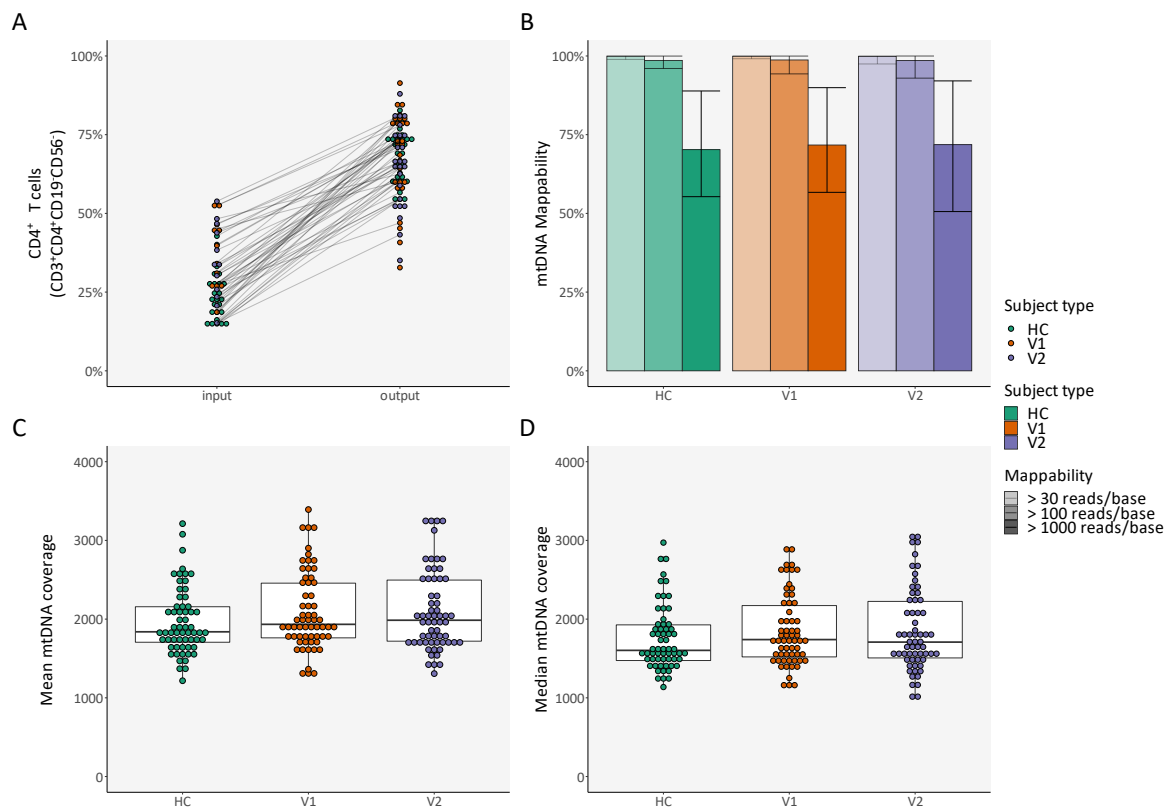

613  
614 **Figure 1 — CD4<sup>+</sup> T cell enrichment and mitochondrial DNA whole genome sequencing**  
615 (A) Percentage of CD4<sup>+</sup> T cells (CD3<sup>+</sup> CD4<sup>+</sup> CD56<sup>-</sup> CD19<sup>-</sup>) before and after magnetic enrichment, as assessed with flow cytometry —  
616 lines connect the same sample; (B) Mean mappability, per subject type and per definition — error bars denote minimum and  
617 maximum values; (C) Mean mtDNA coverage, per subject type; (D) Median mtDNA coverage, per subject type. Abbreviations: HC —  
618 healthy control; mtDNA — mitochondrial DNA; V1 — patient with Clinically Isolated Syndrome/Relapsing-Remitting Multiple  
619 Sclerosis at visit 1; V2 — patient with Clinically Isolated Syndrome/Relapsing-Remitting Multiple Sclerosis at visit 2.

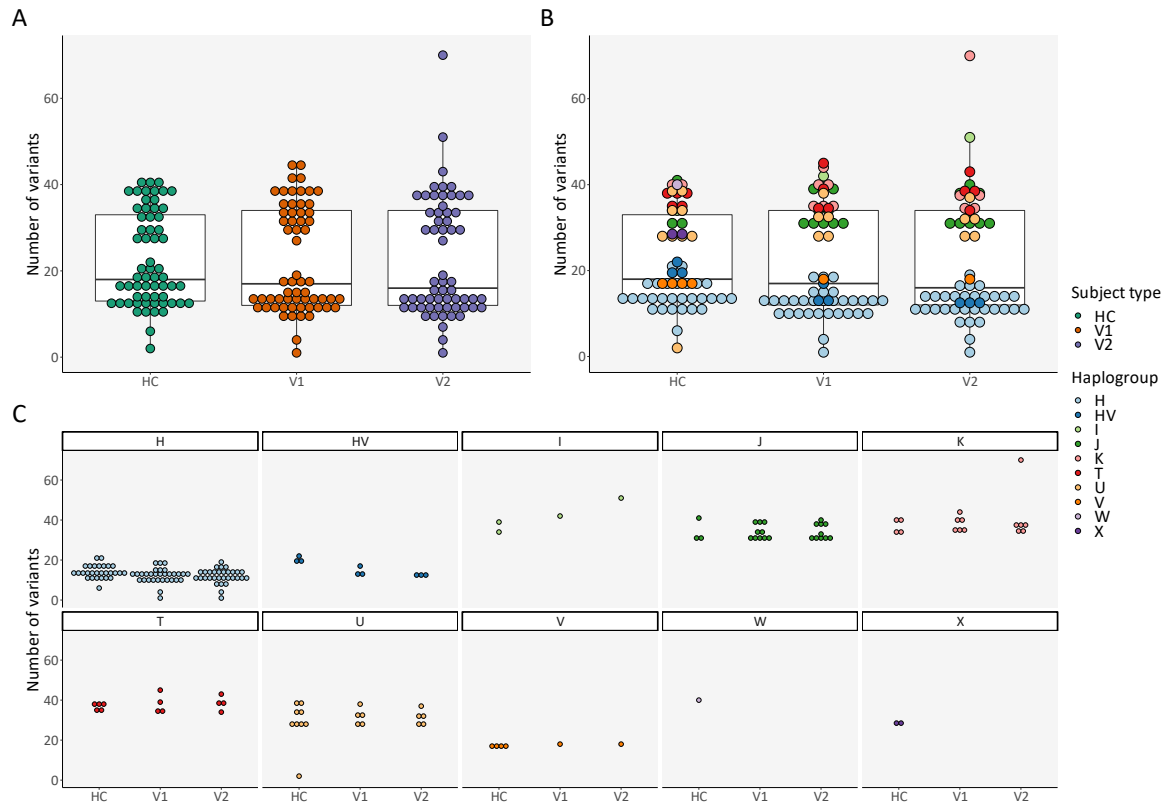

620

621

622

623

624

625

**Figure 2 — Total number of variants: Cross-sectional comparison (subject types and haplogroups)**

(A) Number of variants, per subject type; (B) Number of variants, per subject type and per haplogroup; (C) Expansion of **Figure 2B** for better visualization. Abbreviations: HC — healthy control; V1 — patient with Clinically Isolated Syndrome/Relapsing-Remitting Multiple Sclerosis at visit 1; V2 — patient with Clinically Isolated Syndrome/Relapsing-Remitting Multiple Sclerosis at visit 2.



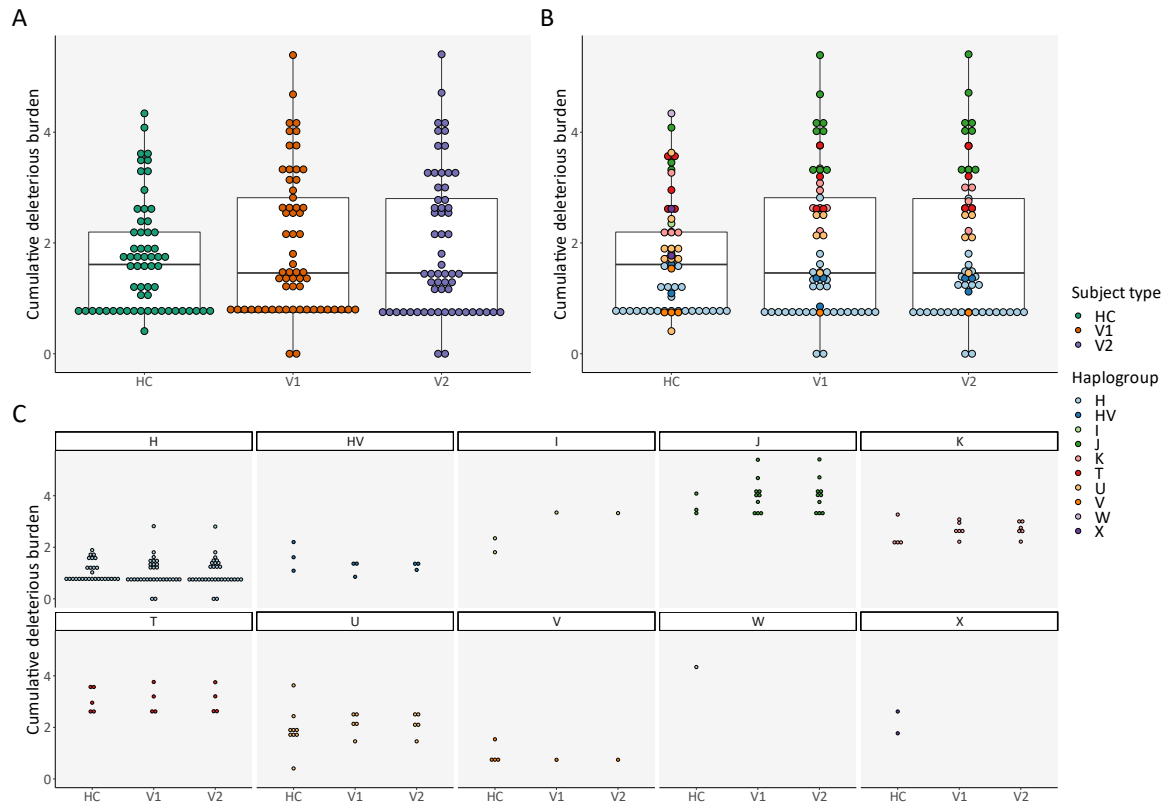

626

627

628

629

630

631

632

**Figure 3 — Cumulative deleterious burden: Cross-sectional comparison (subject types and haplogroups)**

(A) Cumulative deleterious burden, per subject type; (B) Cumulative deleterious burden, per subject type and haplogroup; (C) Expansion of **Figure 3B** for better visualization. Abbreviations: HC — healthy control; V1 — patient with Clinically Isolated Syndrome/Relapsing-Remitting Multiple Sclerosis at visit 1; V2 — patient with Clinically Isolated Syndrome/Relapsing-Remitting Multiple Sclerosis at visit 2.

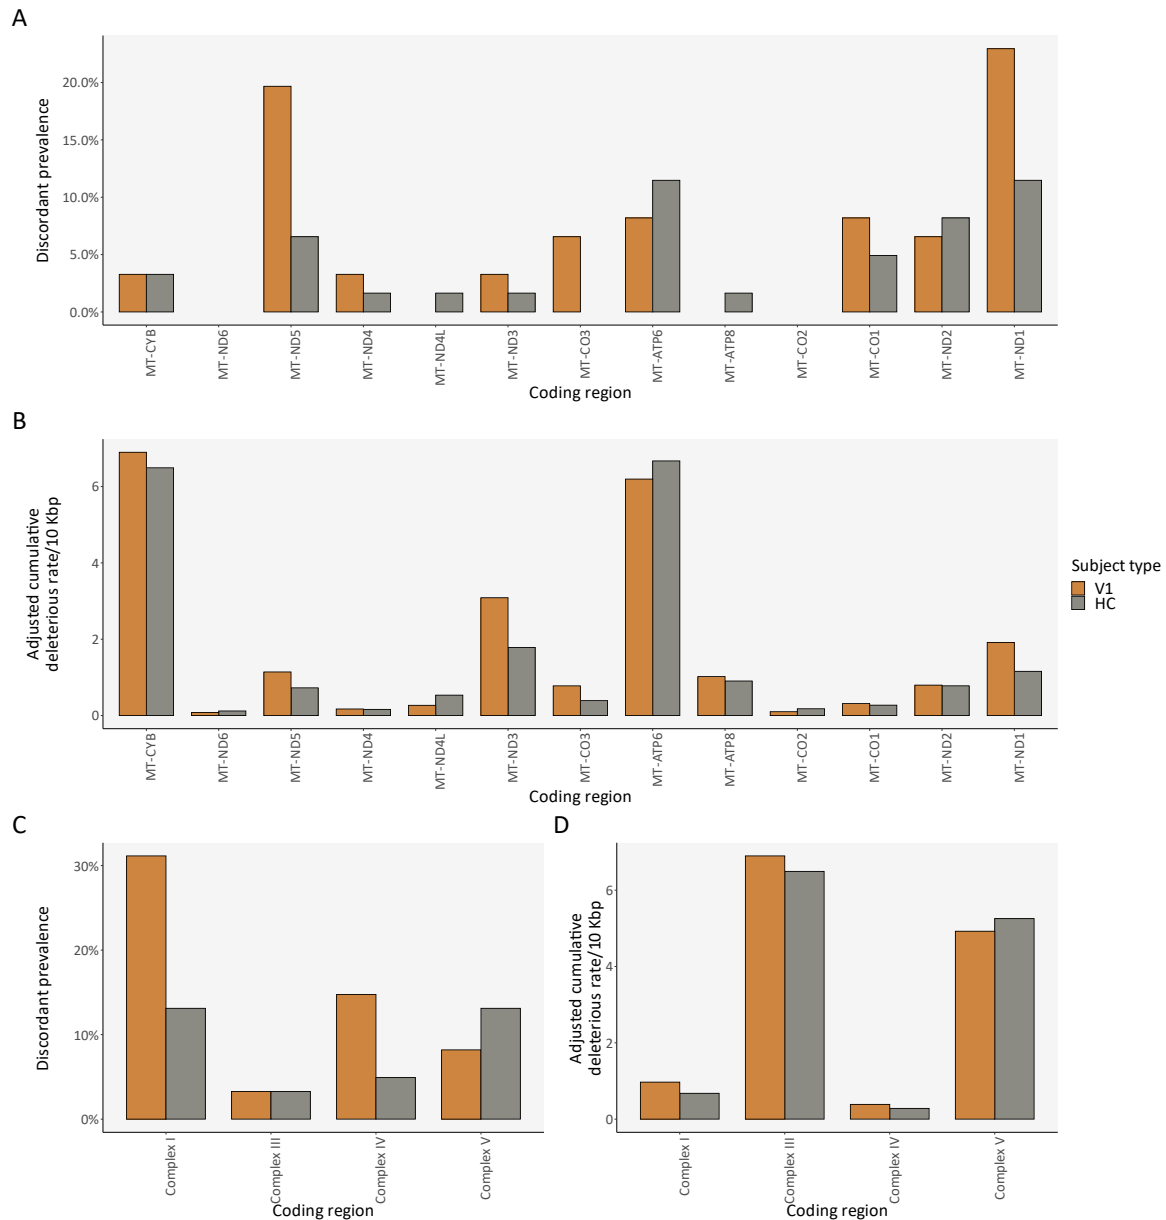

**Figure 4 — Deleterious variants: Cross-sectional comparison (regions)**

(A,C) Discordant prevalence of deleterious variants for each mtDNA coding region/locus and for each macro mtDNA coding region, per subject type, respectively; (B,D) Relative cumulative deleterious burden for each mtDNA coding region/locus and for each macro mtDNA coding region, per subject type, respectively. Abbreviations: bp — base pair; HC — healthy control; V1 — patient with Clinically Isolated Syndrome/Relapsing-Remitting Multiple Sclerosis at visit 1.

633

634

635

636

637

638

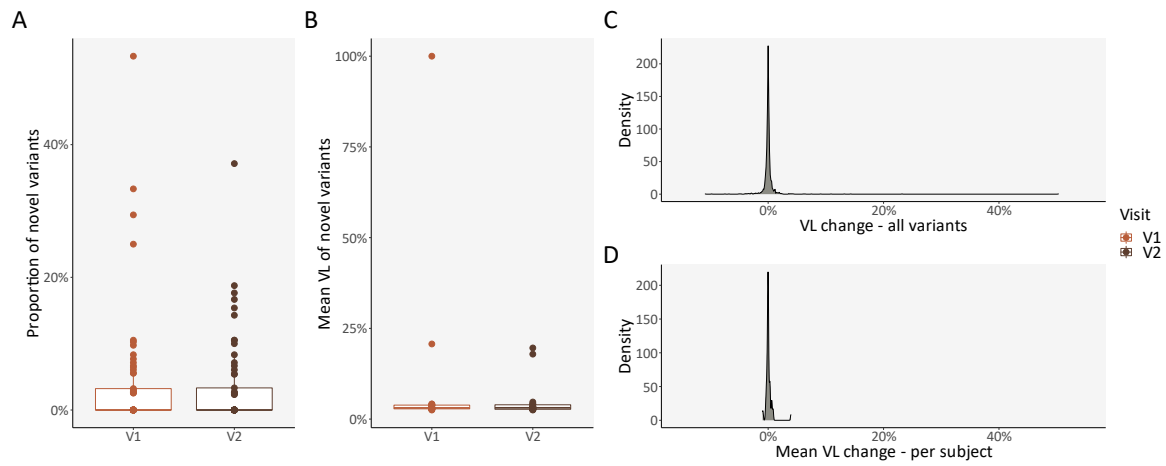

639

640

641

642

643

644

645

### Figure 5 — Longitudinal changes in PwMS: Intrapersonal changes

(A) Proportion of novel variants, per subject and clinical visit; (B) Mean variant level of novel variants, per subject and clinical visit; (C–D) Density plots of variant level change in old variants, for all mutations and per subject, respectively. Abbreviations: PwMS — patients with Clinically Isolated Syndrome/Relapsing-Remitting Multiple Sclerosis; V1 — patient with Clinically Isolated Syndrome/Relapsing-Remitting Multiple Sclerosis at visit 1; V2 — patient with Clinically Isolated Syndrome/Relapsing-Remitting Multiple Sclerosis at visit 2; VL — variant level.

646 14. Tables

647 **Table 1 — Cohort characteristics**

| Variables                   | HC                   | PwMS                                                                      |                                  | N<br>(existing data at<br>both VIS1 and<br>VIS2) |
|-----------------------------|----------------------|---------------------------------------------------------------------------|----------------------------------|--------------------------------------------------|
|                             |                      | V1                                                                        | V2                               |                                                  |
| Age at cohort entry (years) | 32.78 [19–55]        | 32.52 [21–56]                                                             | -                                | 61                                               |
| Females                     |                      | N=40 (66%)                                                                |                                  |                                                  |
| Date of PBMC collection     | 2015/06 –<br>2019/05 | 2011/05 –<br>2015/05                                                      | 2014/01 –<br>2017/11             | 61                                               |
| Diagnostic evolution        | -                    | CIS - CIS, N=14 (23%)<br>CIS - RRMS, N=8 (13%)<br>RRMS - RRMS, N=39 (64%) |                                  | 61                                               |
| Immunomodulatory treatment  | -                    | N=16 (26%)                                                                | N=29 (48%)                       | 61                                               |
| EDSS                        | -                    | 1.50 [0.00–3.50],<br>N=61                                                 | 1.50 [0.00–4.00],<br>N=60        | 60                                               |
| N. relapses                 | -                    | 0.00 [0.00–1.00],<br>N=61                                                 | 0.00 [0.00–5.00],<br>N=61        | 61                                               |
| Time to last relapse(days)  | -                    | 164.85 [29.00–<br>234.00], N=60                                           | 898.10 [10.00–<br>1187.00], N=61 | 60                                               |
| NEDA-3                      | -                    | N=9 (15%)                                                                 |                                  | 59                                               |
| MSFC                        | -                    | -0.01 [-0.96–<br>0.76], N=59                                              | 0.17 [-1.16–1.01],<br>N=58       | 57                                               |
| N. T2 les.                  | -                    | 6.00 [0.00–<br>98.00], N=61                                               | 8.50 [0.00–<br>91.00], N=60      | 60                                               |
| V. T2 les. (mL)             | -                    | 2.04 [0.00–<br>17.97], N=61                                               | 2.52 [0.00–<br>19.16], N=60      | 60                                               |
| N. T1 gd les.               | -                    | 0.00 [0.00–3.00],<br>N=49                                                 | 0.00 [0.00–4.00],<br>N=22        | 15                                               |
| V. T1 gd les. (mL)          | -                    | 0.01 [0.00–0.28],<br>N=49                                                 | 0.03 [0.00–0.26],<br>N=22        | 15                                               |
| GCIPL (mm <sup>3</sup> )    | -                    | 1.98 [1.46–2.32],<br>N=51                                                 | 1.96 [1.44–2.30],<br>N=58        | 50                                               |
| RNFL (µm)                   | -                    | 97.24 [68.00–<br>126.00], N=54                                            | 97.56 [64.50–<br>132.50], N=58   | 52                                               |

648 Numbers show the mean for each value followed by the minimum and maximum values between brackets, except for EDSS,  
649 number of relapses, number of T2 lesions, and number of T1 lesions, where the median value is shown instead of the mean.  
650 Abbreviations: EDSS — expanded disability status scale; GCIPL — ganglion cell-inner plexiform layer; gd — gadolinium; HC —  
651 healthy controls; les. — lesions; MSFC — Multiple Sclerosis functional composite; N. — number; NEDA — no evidence of disease  
652 activity; PBMC — peripheral blood mononuclear cell; PwMS — patients with Clinically Isolated Syndrome/Relapsing-Remitting  
653 Multiple Sclerosis; RNFL — retinal nerve fiber layer; V. — volume; V1 — patients with Clinically Isolated Syndrome/Relapsing-  
654 Remitting Multiple Sclerosis at visit 1; V2 — patients with Clinically Isolated Syndrome/Relapsing-Remitting Multiple Sclerosis at  
655 visit 2; VIS1 — visit 1; VIS2 — visit 2.

656

**Table 2 — Magnetic enrichment and DNA extraction: Summary**

| <b>Subject type</b> | <b>Number of cells after enrichment (millions)</b> | <b>Mortality</b>                      | <b>DNA (Synergy HTX) (ng/μL)</b>    | <b>260/280 ratio</b>              | <b>DNA (Qubit®) (ng/μL)</b>         |
|---------------------|----------------------------------------------------|---------------------------------------|-------------------------------------|-----------------------------------|-------------------------------------|
| HC                  | 3.03<br>[0.37–8.92]                                | 15.15%<br>[4.34–70.86%]               | 20.04<br>[1.45–65.24]               | 1.87<br>[1.19–2.62]               | 13.78<br>[1.91–56.00]               |
| V1                  | 2.38<br>[0.57–6.40]                                | 14.97%<br>[5.57–33.41%]               | 15.59<br>[2.93–45.33]               | 1.89<br>[1.19–3.37]               | 10.43<br>[2.54–37.00]               |
| V2                  | 2.48<br>[0.10–8.10]                                | 17.73%<br>[7.43–56.25%]               | 15.94<br>[3.48–53.46]               | 1.93<br>[1.15–5.20]               | 10.54<br>[0.70–27.20]               |
| <b>All</b>          | <b>2.63</b><br><b>[0.10–8.92]</b>                  | <b>15.95%</b><br><b>[4.34–70.86%]</b> | <b>17.19</b><br><b>[1.45–65.24]</b> | <b>1.90</b><br><b>[1.15–5.20]</b> | <b>11.58</b><br><b>[0.70–56.00]</b> |

657

Numbers show the mean for each value followed by the minimum and maximum values between brackets. Abbreviations: HC —

658

healthy controls; V1 — patients with Clinically Isolated Syndrome/Relapsing-Remitting Multiple Sclerosis at visit 1; V2 — patients

659

with Clinically Isolated Syndrome/Relapsing-Remitting Multiple Sclerosis at visit 2.
